# Supplementary material for: DNA Methylation Associated With Diabetic Kidney Disease in Blood-Derived DNA
Source: PubMed Central journal article supplement (PMC7593403; doi:10.3389/fcell.2020.561907), 2020-10-15
Supplement: Data_Sheet_1.pdf [file Data_Sheet_1.pdf]

**Online Supplementary Material**
**Supplementary Table 1:** Comparison of the average and standard deviation of proportional white cell counts between cases and controls.

|                 | CD8+ T  |       | CD4+ T  |       | natural killer cells |       | B cells |       | monocytes |       | granulocytes |       |
|-----------------|---------|-------|---------|-------|----------------------|-------|---------|-------|-----------|-------|--------------|-------|
|                 | Average | SD    | Average | SD    | Average              | SD    | Average | SD    | Average   | SD    | Average      | SD    |
| <b>Cases</b>    | 0.052   | 0.039 | 0.194   | 0.086 | 0.079                | 0.047 | 0.048   | 0.036 | 0.074     | 0.029 | 0.572        | 0.137 |
| <b>Controls</b> | 0.049   | 0.040 | 0.189   | 0.078 | 0.069                | 0.044 | 0.047   | 0.050 | 0.071     | 0.030 | 0.593        | 0.135 |
| <b>t test</b>   | 0.66    |       | 0.69    |       | 0.12                 |       | 0.81    |       | 0.48      |       | 0.24         |       |

**Supplementary Table 2:** DAVID annotation of top-ranked genes from the 450K discovery analysis.

|                                |                                                                                                                                                                                                                                                                                                                                                                                                                                                                                                                                                      |
|--------------------------------|------------------------------------------------------------------------------------------------------------------------------------------------------------------------------------------------------------------------------------------------------------------------------------------------------------------------------------------------------------------------------------------------------------------------------------------------------------------------------------------------------------------------------------------------------|
| <b>CASS4</b>                   | <a href="#">Cas scaffolding protein family member 4</a>                                                                                                                                                                                                                                                                                                                                                                                                                                                                                              |
| PUBMED_ID                      | 11780052, 12477932, 14702039, 15489334, 18083107, 18088087, 18256281                                                                                                                                                                                                                                                                                                                                                                                                                                                                                 |
| <b>CCNL1</b>                   | <a href="#">cyclin L1</a>                                                                                                                                                                                                                                                                                                                                                                                                                                                                                                                            |
| PUBMED_ID                      | 11042152, 11683997, 11980906, 12414649, 12477932, 12975309, 14623875, 14702039, 15302935, 15489334, 15700036, 16598186, 17494991, 18187866, 18216018, 18220336, 18669648                                                                                                                                                                                                                                                                                                                                                                             |
| <b>CNOT6L</b>                  | <a href="#">CCR4-NOT transcription complex, subunit 6-like</a>                                                                                                                                                                                                                                                                                                                                                                                                                                                                                       |
| KEGG_PATHWAY                   | <a href="#">RNA degradation</a>                                                                                                                                                                                                                                                                                                                                                                                                                                                                                                                      |
| PUBMED_ID                      | 14702039, 15815621, 16344560, 17353931, 17452450, 17974005, 18377426                                                                                                                                                                                                                                                                                                                                                                                                                                                                                 |
| <b>DDX5</b>                    | <a href="#">DEAD (Asp-Glu-Ala-Asp) box polypeptide 5</a>                                                                                                                                                                                                                                                                                                                                                                                                                                                                                             |
| GENETIC_ASSOCIATION_DB_DISEASE | <a href="#">hepatitis C, chronic</a>                                                                                                                                                                                                                                                                                                                                                                                                                                                                                                                 |
| KEGG_PATHWAY                   | <a href="#">Spliceosome</a>                                                                                                                                                                                                                                                                                                                                                                                                                                                                                                                          |
| PUBMED_ID                      | 10409727, 10648785, 10837141, 11250900, 11279182, 11790298, 11991638, 12101238, 12477932, 12527917, 12595555, 12665590, 12738788, 14702039, 15113910, 15298701, 15304501, 15464984, 15489334, 15592455, 15635413, 15660129, 15782174, 15927448, 15950181, 16344560, 16697732, 17018282, 17220478, 17287340, 17353931, 17369852, 17384675, 17540040, 17699760, 17724023, 17924679, 18005418, 18083107, 18239468, 18377426, 18669648, 18691976, 18794152, 18829551, 18954305, 19171422, 19224332, 1996094, 2349099, 2451786, 2762324, 7525583, 7774924 |
| <b>DLX5</b>                    | <a href="#">distal-less homeobox 5</a>                                                                                                                                                                                                                                                                                                                                                                                                                                                                                                               |
| PUBMED_ID                      | 10451362, 10516593, 11084035, 11675124, 11959851, 12145306, 12477932, 12690205, 12782124, 12853948, 14702039, 15489334, 15954098, 16344560, 16467978, 16582099, 17363207, 17701895, 18029348, 18316591, 18413826, 7907794, 7987313, 8889549, 9111364                                                                                                                                                                                                                                                                                                 |
| <b>DST</b>                     | <a href="#">dystonin</a>                                                                                                                                                                                                                                                                                                                                                                                                                                                                                                                             |

|                                |                                                                                                                                                                                                                                                                                                                                                                                                                                                                                                                                                                                                                                                                                                                                                                                                                   |
|--------------------------------|-------------------------------------------------------------------------------------------------------------------------------------------------------------------------------------------------------------------------------------------------------------------------------------------------------------------------------------------------------------------------------------------------------------------------------------------------------------------------------------------------------------------------------------------------------------------------------------------------------------------------------------------------------------------------------------------------------------------------------------------------------------------------------------------------------------------|
| PUBMED_ID                      | 10428034, 10637308, 10727295, 11323216, 11375975, 11751855, 12168954, 12421765, 12477932, 12482924, 12542537, 12802069, 14574404, 14576348, 14581450, 14702039, 14705806, 15231748, 15342556, 15489334, 15560761, 15725571, 16344560, 16512878, 17043677, 17081983, 1712022, 17161423, 1717441, 17287340, 17920818, 17924679, 18187866, 18207369, 18669648, 18781797, 2045679, 2090522, 2276744, 2461961, 2579167, 2645368, 3880796, 7818282, 7919656, 8010969, 8345227, 8349819, 8575775, 8621649, 8889548, 8889549, 9872452                                                                                                                                                                                                                                                                                     |
| <b>ELF1</b>                    | <a href="#">E74-like factor 1 (ets domain transcription factor)</a>                                                                                                                                                                                                                                                                                                                                                                                                                                                                                                                                                                                                                                                                                                                                               |
| PUBMED_ID                      | 10207087, 10377039, 10976766, 11210123, 11884456, 12477932, 12727645, 14702039, 14970218, 15057823, 1527846, 15302935, 1545787, 15489334, 15566516, 16464244, 16964243, 17525332, 17652178, 18029348, 18220336, 18314487, 18378679, 18669648, 18714041, 7862168, 8493578, 8756667, 9094628, 9524226, 9668064                                                                                                                                                                                                                                                                                                                                                                                                                                                                                                      |
| <b>HSPBAP1</b>                 | <a href="#">HSPB (heat shock 27kDa) associated protein 1</a>                                                                                                                                                                                                                                                                                                                                                                                                                                                                                                                                                                                                                                                                                                                                                      |
| PUBMED_ID                      | 10751411, 11978969, 12477932, 12939738, 14702039, 15489334, 16169070, 17568411                                                                                                                                                                                                                                                                                                                                                                                                                                                                                                                                                                                                                                                                                                                                    |
| <b>IL27RA</b>                  | <a href="#">interleukin 27 receptor, alpha</a>                                                                                                                                                                                                                                                                                                                                                                                                                                                                                                                                                                                                                                                                                                                                                                    |
| PUBMED_ID                      | 11057672, 12121660, 12477932, 12734330, 12975309, 14764690, 15489334, 17703412, 18003935, 19258923, 9600072                                                                                                                                                                                                                                                                                                                                                                                                                                                                                                                                                                                                                                                                                                       |
| <b>KIAA1586</b>                | <a href="#">KIAA1586</a>                                                                                                                                                                                                                                                                                                                                                                                                                                                                                                                                                                                                                                                                                                                                                                                          |
| PUBMED_ID                      | 10997877, 12477932, 14574404, 14702039, 15489334                                                                                                                                                                                                                                                                                                                                                                                                                                                                                                                                                                                                                                                                                                                                                                  |
| <b>PIK3CG</b>                  | <a href="#">phosphoinositide-3-kinase, catalytic, gamma polypeptide</a>                                                                                                                                                                                                                                                                                                                                                                                                                                                                                                                                                                                                                                                                                                                                           |
| GENETIC_ASSOCIATION_DB_DISEASE | <a href="#">longevity</a>                                                                                                                                                                                                                                                                                                                                                                                                                                                                                                                                                                                                                                                                                                                                                                                         |
| KEGG_PATHWAY                   | Inositol phosphate metabolism, ErbB signaling pathway, Chemokine signaling pathway, Phosphatidylinositol signaling system, mTOR signaling pathway, Apoptosis, VEGF signaling pathway, Focal adhesion, Toll-like receptor signaling pathway, Jak-STAT signaling pathway, Natural killer cell mediated cytotoxicity, T cell receptor signaling pathway, B cell receptor signaling pathway, Fc epsilon RI signaling pathway, Fc gamma R-mediated phagocytosis, Leukocyte transendothelial migration, Neurotrophin signaling pathway, Regulation of actin cytoskeleton, Insulin signaling pathway, Progesterone-mediated oocyte maturation, Type II diabetes mellitus, Aldosterone-regulated sodium reabsorption, Pathways in cancer, Colorectal cancer, Renal cell carcinoma, Pancreatic cancer, Endometrial cancer, |

Glioma, Prostate cancer, Melanoma, Chronic myeloid leukemia, Acute myeloid leukemia, Small cell lung cancer, Non-small cell lung cancer,

10318860, 10358071, 10386953, 10488142, 10542052, 10571082, 10579793, 10580505, 10816567, 10972292, 11090628, 11136978, 11154208, 11156964, 11181995, 11238738, 11259422, 11416136, 11577104, 11756194, 11756422, 11861293, 11994280, 12077252, 12115604, 12163475, 12242282, 12435806, 12464013, 12473596, 12477932, 12502714, 12507995, 12529294, 12545160, 12551992, 12606772, 12690205, 12757856, 12774123, 12853948, 13130092, 14583609, 14602571, 14605879, 14622970, 15001544, 15044087, 15046613, 15326564, 15489334, 15496972, 15543611, 15558024, 15582274, 15611065, 15668028, 15678501, 15733066, 15741161, 15797027, 15845472, 15878979, 15901830, 15932879, 15993382, 16081599, 16094730, 16127437, 16204373, 16219695, 16286246, 16291747, 16325767, 16328013, 16430866, 16432180, 16507111, 16527821, 16533525, 16647110, 16772787, 16943418, 17001038, 17008323, 17045571, 17126402, 17158252, 17173040, 17235455, 17286201, 17290298, 17302605, 17303701, 17375124, 17410437, 17459875, 17497700, 17515959, 17551921, 17646933, 17658464, 17681345, 17716861, 17724079, 17855501, 17868340, 17878755, 17900864, 17901375, 17942603, 17971428, 17998459, 18025271, 18060476, 18079201, 18187452, 18201823, 18245521, 18273051, 18299320, 18338817, 18374639, 18395956, 18434090, 18451027, 18451140, 18458059, 18467332, 18469852, 18484710, 18495460, 18499442, 18502332, 18511807, 18515365, 18520805, 18535744, 18546844, 18552129, 18558630, 18587247, 18593948, 18603327, 18615538, 18625725, 18632611, 18644721, 18652687, 18663085, 18675921, 18678286, 18711316, 18720410, 18722093, 18725974, 18728784, 18754654, 18766172, 18769058, 18771702, 18810319, 18824170, 18844239, 18849971, 18945831, 18973553, 18983267, 18996102, 19011679, 19017490, 19058789, 19059380, 19079138, 19086053, 19103290, 19152965, 19179443, 19211763, 19224914, 19261616, 19269083, 7520444, 7606002, 7624799, 8313897, 8798481, 9341793, 9394803, 9446654, 9446795, 9507010, 9708406, 9747873, 9808187

PUBMED\_ID

**RAD50**[RAD50 homolog \(\*S. cerevisiae\*\)](#)

GENETIC\_ASSOCIATION\_DB\_DISEASE

breast cancer, lymphoma, Non-Hodgkin's,

KEGG\_PATHWAY  
OMIM\_DISEASE

Homologous recombination, Non-homologous end-joining,

[Genome-Wide Scan on Total Serum IgE Levels Identifies FCER1A as Novel Susceptibility Locus,](#)

|                         |                                                                                                                                                                                                                                                                                                                                                                                                                                                                                                                                                                                                                                                                                                                                                                                                                                                                                                 |
|-------------------------|-------------------------------------------------------------------------------------------------------------------------------------------------------------------------------------------------------------------------------------------------------------------------------------------------------------------------------------------------------------------------------------------------------------------------------------------------------------------------------------------------------------------------------------------------------------------------------------------------------------------------------------------------------------------------------------------------------------------------------------------------------------------------------------------------------------------------------------------------------------------------------------------------|
| PUBMED_ID               | 10346816, 10415333, 10426999, 10783165, 10802669, 10839544, 10888888, 11096100, 11238951, 11438675, 11533665, 11741547, 11790298, 11809878, 11877377, 12007281, 12124628, 12152085, 12384589, 12477932, 12607003, 12607005, 12660252, 12805565, 14550546, 14684699, 14698290, 15064416, 15100233, 15180989, 15234984, 15279769, 15302935, 15456891, 15489334, 15635413, 15653682, 15723659, 15790808, 15937485, 16051665, 16087684, 16163361, 16254336, 16385572, 16474176, 16788144, 16905549, 17081983, 17169801, 17349953, 17426050, 17456004, 17524422, 17525332, 17526493, 17534377, 17567994, 17693401, 17694070, 17700070, 17715134, 17898048, 17932350, 18219098, 18469862, 18596698, 18632984, 18638378, 18669648, 18829552, 18830935, 18846228, 18950845, 19064565, 19064572, 19124506, 19131452, 19190165, 19197236, 19244322, 19383352, 8756642, 9315668, 9590181, 9651580, 9705271 |
| <b>RFC3</b>             | <a href="#">replication factor C (activator 1) 3, 38kDa</a>                                                                                                                                                                                                                                                                                                                                                                                                                                                                                                                                                                                                                                                                                                                                                                                                                                     |
| KEGG_PATHWAY            | DNA replication, Nucleotide excision repair, Mismatch repair                                                                                                                                                                                                                                                                                                                                                                                                                                                                                                                                                                                                                                                                                                                                                                                                                                    |
| PUBMED_ID               | 10051561, 10884395, 11572977, 11907025, 12171929, 12192049, 12477932, 12766176, 12930902, 14605214, 14702039, 15489334, 15635413, 16079077, 16344560, 17456004, 17525332, 19237606, 7774928, 8125298, 8441605, 8692848, 9092549, 9111189, 9121429, 9228079, 9373149, 9488738, 9822671                                                                                                                                                                                                                                                                                                                                                                                                                                                                                                                                                                                                           |
| <b>RUFY1</b>            | <a href="#">RUN and FYVE domain containing 1</a>                                                                                                                                                                                                                                                                                                                                                                                                                                                                                                                                                                                                                                                                                                                                                                                                                                                |
| KEGG_PATHWAY            | <a href="#">Endocytosis</a>                                                                                                                                                                                                                                                                                                                                                                                                                                                                                                                                                                                                                                                                                                                                                                                                                                                                     |
| PUBMED_ID               | 11172003, 11877430, 12477932, 14617813, 14702039, 15342556, 15489334, 16344560, 16959974, 17525332,                                                                                                                                                                                                                                                                                                                                                                                                                                                                                                                                                                                                                                                                                                                                                                                             |
| <b>TBC1D1</b>           | <a href="#">TBC1 (tre-2/USP6, BUB2, cdc16) domain family, member 1</a>                                                                                                                                                                                                                                                                                                                                                                                                                                                                                                                                                                                                                                                                                                                                                                                                                          |
| PUBMED_ID               | 10470851, 10965142, 12168954, 12477932, 14702039, 15231748, 15324660, 15489334, 15592455, 16303743, 16893906, 17274760, 18325908, 19077034, 19115052                                                                                                                                                                                                                                                                                                                                                                                                                                                                                                                                                                                                                                                                                                                                            |
| <b>ZNF187 (ZSCAN26)</b> | <a href="#">zinc finger protein 187</a>                                                                                                                                                                                                                                                                                                                                                                                                                                                                                                                                                                                                                                                                                                                                                                                                                                                         |
| PUBMED_ID               | 12477932, 14574404, 14702039, 15489334, 1569959, 16344560, 17974005                                                                                                                                                                                                                                                                                                                                                                                                                                                                                                                                                                                                                                                                                                                                                                                                                             |
| <b>ISPD (CRPPA)</b>     | <a href="#">notch1-induced protein</a>                                                                                                                                                                                                                                                                                                                                                                                                                                                                                                                                                                                                                                                                                                                                                                                                                                                          |
| PUBMED_ID               | 10737800, 11181995, 12690205, 12853948, 9847074                                                                                                                                                                                                                                                                                                                                                                                                                                                                                                                                                                                                                                                                                                                                                                                                                                                 |

**Supplementary Table 3:** Most associated SNPs, based on genome-wide association study with significance values adjusted for genomic control and clinical covariates, in the region of interest from the 450K discovery analysis.

| <b>Locus</b>      | <b><math>\Delta\beta</math></b> | <b><i>P</i></b> | <b>Most associated SNP</b> | <b>Pgc for SNP</b> |
|-------------------|---------------------------------|-----------------|----------------------------|--------------------|
|                   | <b>DN vs DC</b>                 | <b>DN vs DC</b> |                            |                    |
| <b>cg10905876</b> | 0.22                            | 8.90E-22        | rs16888186                 | 7.9E-04            |
| <b>cg20419181</b> | 0.26                            | 5.20E-23        | rs2114014                  | 1.18E-03           |
| <b>cg03037561</b> | 0.2                             | 3.20E-18        | rs2189735                  | 4.56E-03           |
| <b>cg25418748</b> | 0.21                            | 5.00E-22        | rs11541393                 | 8.82E-03           |
| <b>cg15189015</b> | 0.22                            | 3.00E-22        | rs6501732                  | 1.12E-02           |
| <b>cg10463299</b> | 0.23                            | 2.30E-22        | rs17462136                 | 1.27E-02           |
| <b>cg16595484</b> | 0.22                            | 2.40E-21        | rs17212608                 | 1.34E-02           |
| <b>cg04861640</b> | 0.23                            | 3.70E-24        | rs1778508                  | 3.81E-02           |
| <b>cg02339392</b> | 0.21                            | 2.20E-22        | rs1778508                  | 3.81E-02           |
| <b>cg07979357</b> | 0.2                             | 1.80E-22        | rs2420413                  | 0.079              |
| <b>cg21739208</b> | 0.22                            | 6.80E-23        | rs7768651                  | 0.12               |
| <b>cg21935083</b> | 0.22                            | 5.40E-23        | rs17772583                 | 0.12               |
| <b>cg00618312</b> | 0.2                             | 2.40E-22        | rs1056835                  | 0.13               |
| <b>cg21829265</b> | 0.21                            | 4.10E-23        | rs9367704                  | 0.18               |
| <b>cg16203607</b> | 0.21                            | 2.10E-23        | rs8071264                  | 0.19               |

---

|                   |      |          |            |      |
|-------------------|------|----------|------------|------|
| <b>cg11671265</b> | 0.24 | 5.00E-18 | rs17448536 | 0.23 |
| <b>cg24115040</b> | 0.22 | 2.10E-22 | rs3757492  | 0.25 |
| <b>cg01667324</b> | 0.2  | 5.30E-21 | rs3135527  | 0.29 |
| <b>cg26399113</b> | 0.22 | 1.00E-12 | rs4719110  | 0.34 |
| <b>cg08779777</b> | 0.26 | 1.50E-20 | rs3173908  | 0.36 |
| <b>cg07242860</b> | 0.22 | 7.20E-23 | rs7722108  | 0.41 |
| <b>cg02399570</b> | 0.21 | 8.60E-22 | rs9878138  | 0.49 |

---

**Supplementary Figure 1:** Gene expression evidence generated in and derived from NephroSeq for *CCNL1* & *ZNF187* genes. (a) Distribution of *CCNL1* and (b) *ZNF187* mRNA in kidney tissues. (c) Summary of significant analyses returned from NephroSeq. (d) Expression of *CCNL1* based on analysis of kidney and blood-derived RNA. (e) Expression of *ZNF187* based on analysis of kidney and blood-derived RNA

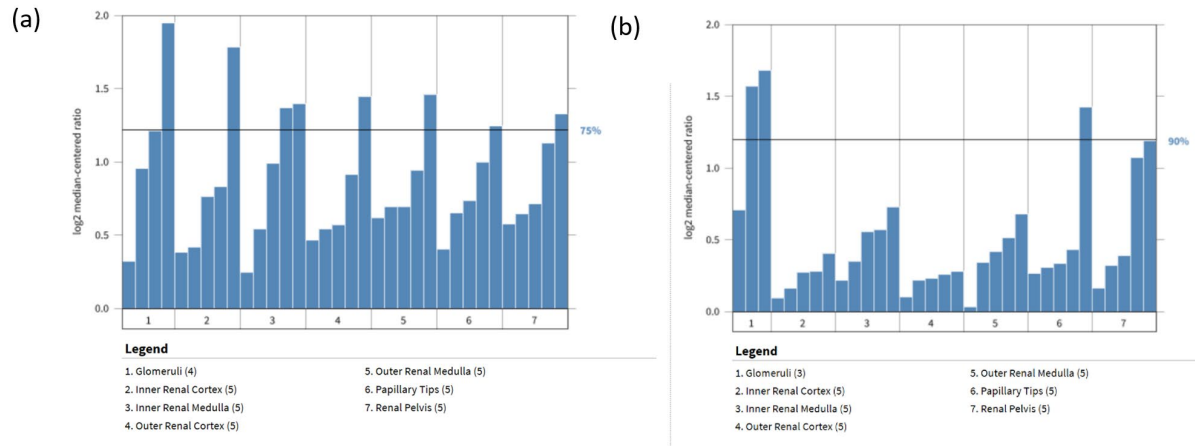

**(c) Analyses for CCNL1**

| ANALYSIS TYPE                  | SIGNIFICANT* ANALYSES | TOTAL UNIQUE ANALYSES |
|--------------------------------|-----------------------|-----------------------|
| Tissue Type Analyses           | 9                     | 40                    |
| GFR Analyses                   | 5                     | 41                    |
| Age Analyses                   | 4                     | 44                    |
| Blood Pressure Analyses        | 3                     | 23                    |
| Disease vs. Control Analyses   | 3                     | 50                    |
| Weight Analyses                | 3                     | 34                    |
| Race Ethnicity Analyses        | 2                     | 46                    |
| Serum Creatinine Analyses      | 2                     | 45                    |
| Transplant Analyses            | 2                     | 9                     |
| Body Mass Index Analyses       | 1                     | 25                    |
| Fasting Blood Glucose Analyses | 1                     | 4                     |
| Proteinuria Analyses           | 1                     | 53                    |
| Sex Analyses                   | 1                     | 49                    |

**(c) Analyses for ZNF187**

| ANALYSIS TYPE             | SIGNIFICANT* ANALYSES | TOTAL UNIQUE ANALYSES |
|---------------------------|-----------------------|-----------------------|
| Serum Creatinine Analyses | 5                     | 46                    |
| Tissue Type Analyses      | 5                     | 39                    |
| GFR Analyses              | 4                     | 31                    |
| Proteinuria Analyses      | 3                     | 42                    |
| Transplant Analyses       | 2                     | 14                    |
| Weight Analyses           | 2                     | 33                    |
| Blood Pressure Analyses   | 1                     | 23                    |
| Race Ethnicity Analyses   | 1                     | 36                    |

**(d) Expression of CCNL1**

| ANALYSIS                                                 | p VAL   | r VAL | FOLD CHANGE | DATASET             |
|----------------------------------------------------------|---------|-------|-------------|---------------------|
| Disease vs. Control Analysis                             | 3.55e-9 |       | -1.693      | Ju CKD Glom         |
| Thin Basement Membrane Disease vs. Healthy Living Donor  |         |       |             |                     |
| Disease vs. Control Analysis                             | 1.84e-5 |       | -1.550      | Nakagawa CKD Kidney |
| Chronic Kidney Disease vs. Normal Kidney (Discovery Set) |         |       |             |                     |

**(e) Expression of ZNF187**

| ANALYSIS                                                | p VAL | r VAL | FOLD CHANGE | DATASET                  |
|---------------------------------------------------------|-------|-------|-------------|--------------------------|
| Transplant Analysis                                     | 0.011 |       | 1.751       | Gunther Transplant Blood |
| Acute Rejection vs. No Rejection (Males)                |       |       |             |                          |
| Transplant Analysis                                     | 0.012 |       | 1.597       | Gunther Transplant Blood |
| Acute Rejection vs. No Rejection (All Measured Samples) |       |       |             |                          |
| GFR (MDRD) Analysis (IgA Nephropathy Samples)           | 0.022 | 0.783 |             | Cox IgAN Blood           |



(e)

| Threshold by: <input type="checkbox"/> FOLD   <input type="checkbox"/> P-VAL   <input type="checkbox"/> FOLD CHANGE |         |        |             |                               |
|---------------------------------------------------------------------------------------------------------------------|---------|--------|-------------|-------------------------------|
| Threshold by: 0.05   0.5   1.5                                                                                      |         |        |             |                               |
| ANALYSIS                                                                                                            | p VAL   | r VAL  | FOLD CHANGE | DATASET                       |
| <br>Transplant Analysis<br>Acute Rejection vs. No Rejection (All Measured Samples)                                  | 2.80e-5 |        | 1.662       | Serum Transplant Kidney       |
| <br>GFR (MDRD) Analysis<br>(IgA Nephropathy Samples)                                                                | 6.27e-4 | 0.647  |             | Rein IgAN Tuberc              |
| <br>Transplant Analysis<br>Acute Rejection vs. Normal Kidney (All Measured Samples)                                 | 0.001   |        | 1.541       | Serum Transplant Kidney       |
| <br>Proximal Analysis<br>(Minimal Change Disease Samples)                                                           | 0.009   | 0.904  |             | Serum Nephrotic Syndrome Glom |
| <br>Serum Creatinine Analysis<br>(IgA Nephropathy Samples)                                                          | 0.005   | -0.517 |             | Ju CKD Tubine                 |
| <br>Serum Creatinine Analysis<br>(IgA Nephropathy Samples)                                                          | 0.006   | -0.516 |             | Ju CKD Glom                   |
| <br>Serum Creatinine Analysis<br>(Living Donors)                                                                    | 0.006   | -0.801 |             | Hecmer Transplant Blood       |
| <br>Serum Creatinine Analysis<br>(Vascular Samples)                                                                 | 0.007   | -0.550 |             | Ju CKD Glom                   |
| <br>GFR (MDRD) Analysis<br>(All Measured Samples)                                                                   | 0.008   | 0.500  |             | Wormonia Diabetes Glom        |
| <br>Proximal Analysis<br>(IgA Nephropathy Samples)                                                                  | 0.014   | 0.304  |             | Rein IgAN Glom                |
| <br>GFR (MDRD) Analysis<br>(Living Donors)                                                                          | 0.018   | 0.840  |             | Hecmer Transplant Blood       |
| <br>GFR (MDRD) Analysis<br>(Nephrosclerosis Samples)                                                                | 0.020   | 0.612  |             | Hecmer Pyelonephritis Glom    |
| <br>Serum Creatinine Analysis<br>(Tumor Nephrectomy Samples)                                                        | 0.026   | 0.574  |             | Ju CKD Glom                   |
| <br>Proximal Analysis<br>(Open Donor Nephropathy Samples)                                                           | 0.045   | -0.821 |             | Kurian Transplant Kidney      |
